# Supplementary material for: Effect of the FA2H Gene on cashmere fineness of Jiangnan cashmere goats based on transcriptome sequencing
Source: PubMed Central journal article supplement (PMC9306159; doi:10.1186/s12864-022-08763-7), 2022-07-21
Supplement: 12864_2022_8763_MOESM1_ESM.pdf [file 12864_2022_8763_MOESM1_ESM.pdf]

Table S1. RNA-Seq quality control result

| Sample Name | Read Sum   | Base Sum       | GC/%  | Q20/% | Q30/% |
|-------------|------------|----------------|-------|-------|-------|
| Ce-1        | 36,417,155 | 10,878,015,024 | 48.07 | 98.47 | 95.37 |
| Ce-2        | 37,219,205 | 11,098,838,522 | 47.49 | 98.38 | 95.15 |
| Ce-3        | 42,190,124 | 12,587,086,652 | 46.92 | 98.39 | 95.14 |
| Ce-4        | 37,380,818 | 11,139,683,870 | 47.9  | 98.58 | 95.65 |
| Fe-1        | 37,058,161 | 11,051,625,508 | 47.41 | 98.54 | 95.58 |
| Fe-2        | 39,272,819 | 11,719,721,120 | 46.92 | 98.35 | 95.03 |
| Fe-3        | 42,348,243 | 12,644,980,448 | 47    | 98.42 | 95.21 |
| Fe-4        | 38,721,645 | 11,555,012,892 | 47.02 | 98.4  | 95.14 |

Note: Read Sum: total number of pair-end Reads in Clean Data; Base Sum: Clean Data Total Base number; GC: GC content of Clean Data, that is, the percentage of G and C bases in total bases in Clean Data; N: percentage of unrecognized bases in total bases in Clean Data; Q30: Clean Data Percentage of bases with a mass value greater than or equal to Q30.

Table S2. Reference genome alignment read statistics

| Sample Name | Total Reads | Mapped Resds           | Unique Mapped Reads    | Multiple Mapped Reads | Reads Map to '+'       | Reads Map to '-'       |
|-------------|-------------|------------------------|------------------------|-----------------------|------------------------|------------------------|
| Ce-1        | 72,834,310  | 70,606,897<br>(96.94%) | 68,742,561<br>(94.38%) | 1,864,336<br>(2.56%)  | 34,844,100<br>(47.84%) | 35,052,520<br>(48.13%) |
| Ce-2        | 74,438,410  | 71,999,939<br>(96.72%) | 70,220,158<br>(94.33%) | 1,779,781<br>(2.39%)  | 35,474,192<br>(47.66%) | 35,714,193<br>(47.98%) |
| Ce-3        | 84,380,248  | 81,917,582<br>(97.08%) | 80,047,193<br>(94.86%) | 1,870,389<br>(2.22%)  | 40,455,337<br>(47.94%) | 40,692,115<br>(48.22%) |
| Ce-4        | 74,761,636  | 72,677,614<br>(97.21%) | 70,419,223<br>(94.19%) | 2,258,391<br>(3.02%)  | 35,551,298<br>(47.55%) | 35,962,380<br>(48.10%) |
| Fe-1        | 74,116,322  | 71,933,700<br>(97.06%) | 70,038,566<br>(94.50%) | 1,895,134<br>(2.56%)  | 35,414,125<br>(47.78%) | 35,686,086<br>(48.15%) |
| Fe-2        | 78,545,638  | 75,901,736<br>(96.63%) | 74,231,526<br>(94.51%) | 1,670,210<br>(2.13%)  | 37,522,695<br>(47.77%) | 37,727,620<br>(48.03%) |
| Fe-3        | 84,696,486  | 82,034,935<br>(96.86%) | 80,090,317<br>(94.56%) | 1,944,618<br>(2.30%)  | 40,493,218<br>(47.81%) | 40,734,236<br>(48.09%) |
| Fe-4        | 77,443,290  | 75,262,378<br>(97.18%) | 73,391,963<br>(94.77%) | 1,870,415<br>(2.42%)  | 37,116,153<br>(47.93%) | 37,340,760<br>(48.22%) |

Note: ID: uniform serial number of samples; Total Reads: number of Clean Reads, by single end; The number of Reads Mapped into the reference genome and the percentage of Clean Reads. Uniq Mapped Reads: Number of Reads Mapped to unique locations in the reference genome and percentage of Clean Reads The number of Multiple Mapped Reads in the reference genome and the percentage in Clean Reads. Reads Map to '+': the number and percentage of Clean Reads compared to the reference genome plus strand. Reads Map to '-': compares the number of negative links of Reads to the reference genome and the percentage of Clean Reads.

Table S3. Primer information

| Gene Name        | Sequence (5'-3')                                       | Product Length/bp | ID             |
|------------------|--------------------------------------------------------|-------------------|----------------|
| LOC108635406     | F: TCCTTCTCTTTGCGGCGGAAG<br>R: AATGAGATTGTGGAAGATGCCCG | 167               | XM_018045561.1 |
| MUCL1            | F: GTGGCAGTTTCCACCTTCCT<br>R: ATCAACAGTGGTTGTATCAGAGG  | 90                | XM_018049088.1 |
| LOC108636093     | F: ATGCCTCACTTCTATATTGCC<br>R: CCACAGTGGTTGTATCAGAGGC  | 90                | XM_018049017.1 |
| LOC106503216     | F: GGTGTGTCCAGCTGCTACC<br>R: CACAGACTGGCAACACCG        | 171               | XM_018065078.1 |
| LOC102173780     | F: GAGCTGCAGAGGTCCTGTTT<br>R: GTGGGTCACAGCTGGATGAT     | 101               | XM_018065045.1 |
| FA2H             | F: CGAGCACTCAGAAGACAG<br>R: GCCATAGTAGGACCAACTG        | 266               | XM_018061705.1 |
| BMP2             | F: ACAACCCGGCGATTCTTCTT<br>R: TTGGAGTTAGCTGTGGCAGG     | 173               | NM_001287564.1 |
| BMP4             | F: CTCAACCAACCACGCCATTG<br>R: CGGCAACCACATCCCTCTAC     | 174               | NM_001285646.1 |
| BMP6             | F: CTTCTTCAAGGCCAGTGAGGT<br>R: TGCTGTTGTAGTCTGCTGAGG   | 137               | XM_018038922.1 |
| SHH              | F: GGAGTCGCTGCACTATGAGG<br>R: TCACTGAGCAGTGGATGTGC     | 149               | XM_018046646.1 |
| FGF7             | F: TGACATGGATCCTGCCAAGTT<br>R: AGCCATTTGCTCTGGAGTCAT   | 107               | XM_005685797.3 |
| FGF10            | F: GCATGTGCGGAGCTACAATC<br>R: TACCGCTGACCTTTCCGTTC     | 104               | XM_005694730.3 |
| FGF5             | F: TGCTGTGTCTCAGGGGATTG<br>R: TGTGTATCGCGGAGGCATAG     | 167               | NM_001291973.1 |
| $\beta$ -Catenin | F: ACACAGTTCGATGCTGCTCA<br>R: GATTGCACGTGTGGCAAGTT     | 126               | XM_018066894.1 |
| GAPDH            | F:GGCGTGAACCACGAGAAGTAT<br>R:ATGGCGTGGACAGTGGTCAT      | 143               | XM_005680968.3 |

Table S4. Sequence information of *FA2H* gene interference fragments

| Sequence Name | Sequence (5'-3')                                     |
|---------------|------------------------------------------------------|
| FA2H-si-444   | F: GCCACUUGGGAGAGAAGUATT<br>R: UACUUCUCUCCCAAGUGGCTT |
| FA2H-si-594   | F: GGUCCUACUAUGGCGCCUUTT<br>R: AAGGCGCCAUAGUAGGACCTT |
| FA2H-si-771   | F: GCGACAGCGCUUACCUCAUTT<br>R: AUGAGGUAAGCGCUGUCGCTT |
| si-NC         | F: UUCUCCGAACGUGUCACGUTT<br>R: ACGUGACACGUUCGGAGAATT |

Table S5. Primers information for *FA2H* gene cloning

| Gene name   | Sequence (5'-3')                                                                              |
|-------------|-----------------------------------------------------------------------------------------------|
| <i>FA2H</i> | F: ACTCACTATAGGGAGACCCAAGCTGGCTAGCATGGCC<br>R: AGCGGGTTTAAACGGGCCCTCTAGACTCGAGTCACTGCGTCTTCGG |

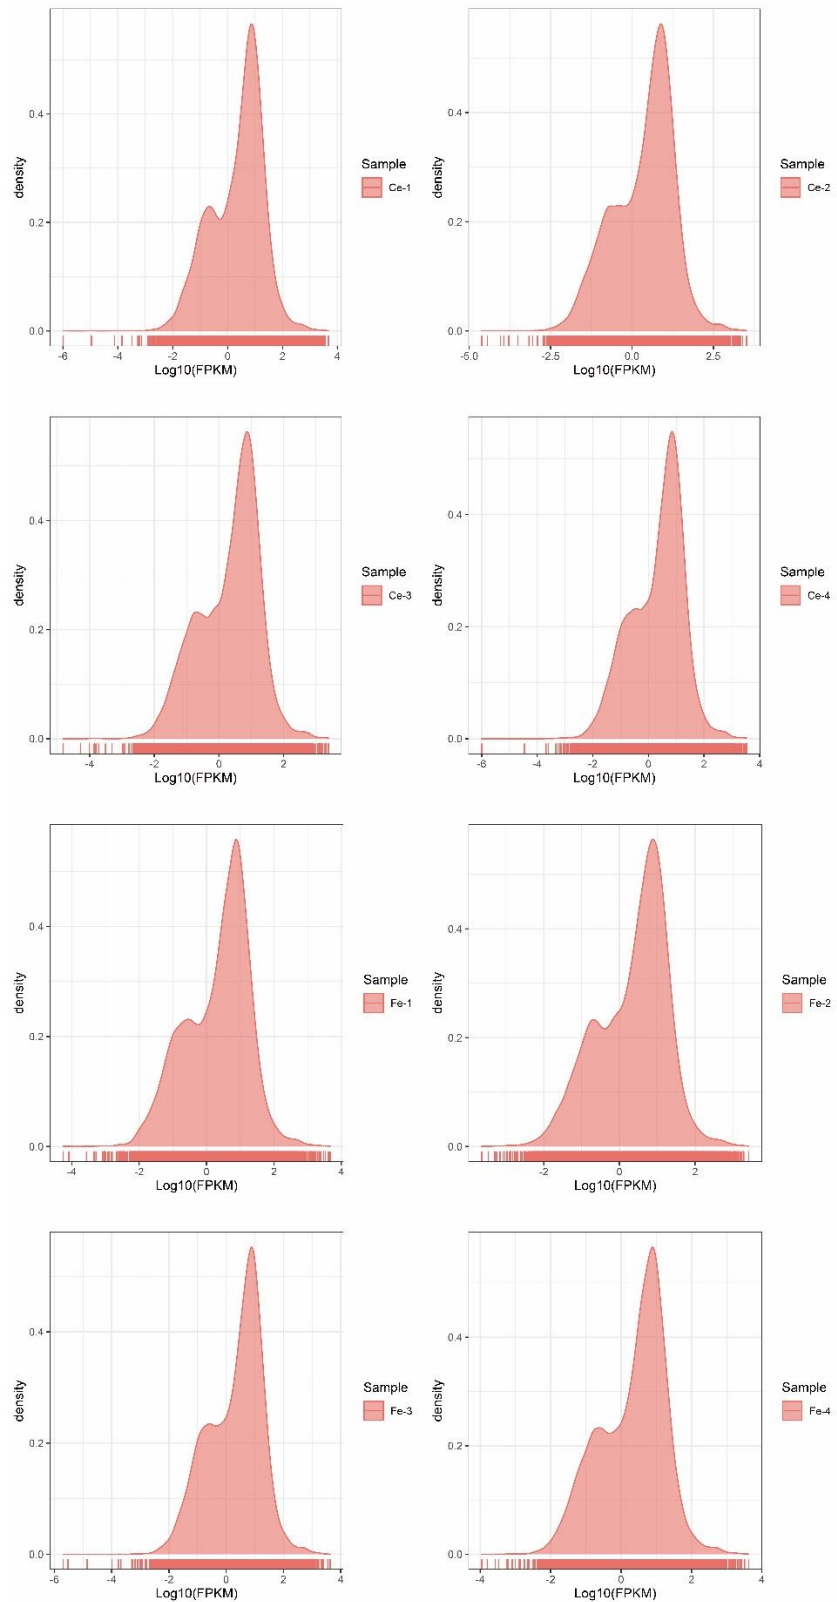

Fig. S1 Comparison of FPKM density distribution of each sample. Different colors in the figure represent different samples, the abscissa represents the logarithm of the FPKM of the corresponding sample, and the ordinate represents the probability density.

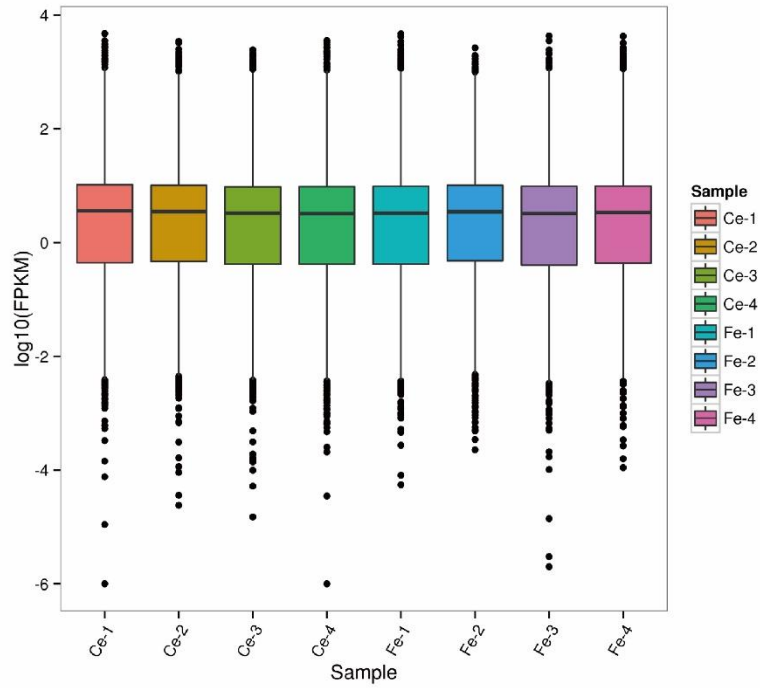

Fig. S2 FPKM boxplot of each sample. The abscissa in the figure represents different samples; the ordinate represents the logarithm of the FPKM expression of the samples.

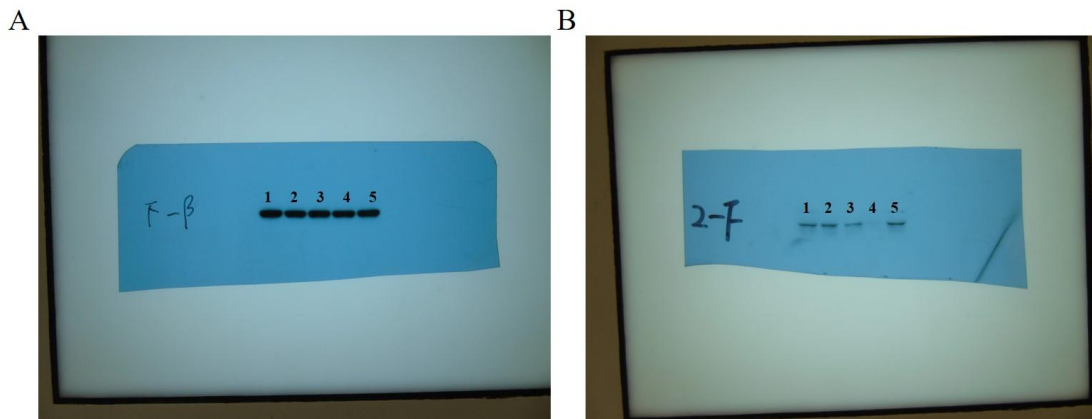

Fig. S3 Untrimmed original image of Figure 7B. A. Anti-beta-Actin Polyclonal Antibody; B. FAAH1 Polyclonal Antibody. Different lanes 1-5 are represented as Blank, si-NC, si-444, si-594, and si-771 respectively.

A

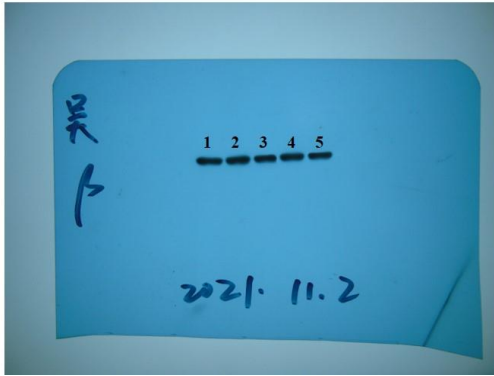

B

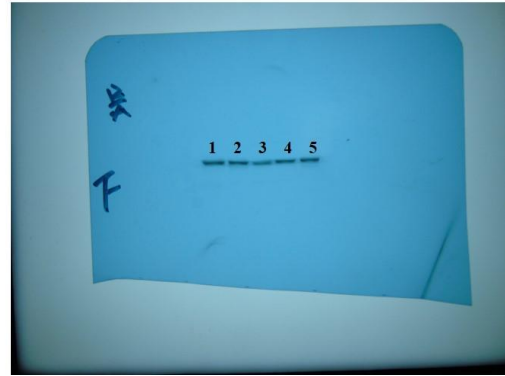

Fig. S4 Untrimmed original image of Figure 7D. A. Anti-beta-Actin Polyclonal Antibody; B. FAAH1 Polyclonal Antibody. Different lanes 1-5 are Blank, si-NC, si-594, FA2H-NC, and FA2H respectively
